# Supplementary material
Source: publisher figshare collection journal article supplement (https://sage.figshare.com/ndownloader/files/17709980)
Supplement: Supplementary file 1 [file 17709980]

## Supplement 2:

### Educational Module Key Topics

- Overview of Basic Anatomy
- Indications for Tracheostomy
- Overview of Surgical Technique
- Tracheostomy versus Laryngectomy
- Types of Tubes
- Management of Tracheostomy
  - Humidification
  - Suctioning
  - Peri-stomal skin care
  - Cleaning the tube
  - Securing the tube
- Voicing
- Decannulation
- Common Misconceptions
- Complications
- What to do in an Emergency
  - Respiratory distress
  - Accidental decannulation
  - Tracheostomy site bleeding
- When to call Otolaryngology
